# Supplementary material
Source: Elsevier journal article supplement (https://www.sciencedirect.com/science/article/pii/S2444866416301519)
Supplement: mmc1 [file S2444866416301519:mmc1.docx]

**Table S1**

**Correlations between phytochemical contents and antioxidant power of *C. caudatus* extract/fraction.**

| **Correlations between phytochemical contents and antioxidant power** | **Pearson Correlation** | **Remarks** |
| --- | --- | --- |
| TPC **with** ABTS | 0.949 | Correlation is significant at the 0.01 level (2-tailed) |
| TPC **with** DPPH | 0.976 | Correlation is significant at the 0.01 level (2-tailed) |
| TPC **with** BCB | 0.972 | Correlation is significant at the 0.01 level (2-tailed) |
| TPC **with** Iron chelating assay | 0.664 | Non-significant correlation |
| TSC **with** ABTS | 0.963 | Correlation is significant at the 0.01 level (2-tailed) |
| TSC **with** DPPH | 0.986 | Correlation is significant at the 0.01 level (2-tailed) |
| TSC **with** BCB | 0.972 | Correlation is significant at the 0.01 level (2-tailed) |
| TSC **with** Iron chelation assay | 0.692 | Correlation is significant at the 0.05 level (2-tailed) |
| TSSC **with** ABTS | 0.968 | Correlation is significant at the 0.01 level (2-tailed) |
| TSSC **with** DPPH | 0.989 | Correlation is significant at the 0.01 level (2-tailed) |
| TSSC **with** BCB | 0.976 | Correlation is significant at the 0.01 level (2-tailed) |
| TSSC **with** Iron chelation assay | 0.693 | Correlation is significant at the 0.05 level (2-tailed) |

TPC: total phenolic content, TSC: total saponin content, TSSC: total steroidal saponin content, ABTS: 2,2'-azino-bis(3-ethylbenzothiazoline-6-sulphonic acid) assay, DPPH: 2,2-diphenyl-1-picrylhydrazyl assay, BCB: beta-carotene bleaching assay.
